# Supplementary material for: Drug Repurposing Targeting Pseudomonas aeruginosa MvfR Using Docking, Virtual Screening, Molecular Dynamics, and Free-Energy Calculations
Source: MDPI journal article supplement (doi:10.3390/antibiotics11020185), 2022-01-31
Supplement: s1 [file s1]

# Drug repurposing in the battle against *P. aeruginosa* MvfR using Docking, Virtual Screening, Molecular Dynamics, and Free Energy Calculations

Tatiana F. Vieira<sup>1,2</sup>, Rita P. Magalhães<sup>1,2</sup>, Manuel Simões<sup>3</sup>, Sérgio F. Sousa<sup>1,2</sup>

<sup>1</sup> UCIBIO/REQUIMTE, BioSIM – Departamento de Medicina, Faculdade de Medicina da Universidade Do Porto, Alameda Prof. Hernâni Monteiro, 4200-319 Porto, Portugal

<sup>2</sup> Associate Laboratory i4HB - Institute for Health and Bioeconomy, Faculdade de Medicina, Universidade do Porto, 4200-319 Porto, Portugal

<sup>3</sup> LEPABE Laboratory for Process Engineering, Environment, Biotechnology and Energy, Faculty of Engineering, University of Porto, Rua Dr. Roberto Frias, s/n, 4200-465 Porto, Portugal

**Table S1.** Cross-docking scores obtained with the six scoring functions tested.

|      |     | Vina   |       |       |        |       |       |       |        |       |       |       |       |
|------|-----|--------|-------|-------|--------|-------|-------|-------|--------|-------|-------|-------|-------|
|      |     | 4JVC   | 4JVD  | 4JVI  | 6B8A   | 6Q7U  | 6Q7V  | 6Q7W  | 6TPR   | 6Z07  | 6Z17  | 6Z5K  | 6YZ3  |
| 4JVD | NNQ | -7.20  | -7.20 | -7.10 | -7.30  | -7.70 | -7.30 | -7.50 | -7.70  | -7.50 | -7.50 | -7.50 | -7.60 |
| 4JVI | QZN | -7.50  | -9.80 | -7.80 | -7.90  | -9.90 | -7.80 | -8.00 | -7.60  | -7.30 | -7.50 | -7.60 | -7.80 |
| 6B8A | M64 | -9.00  | -9.10 | -9.00 | -9.90  | -9.40 | -8.70 | -9.20 | -9.30  | -8.10 | -7.80 | -7.80 | -8.10 |
| 6Q7U | HLH | -6.70  | -7.00 | -7.20 | -7.00  | -8.00 | -7.00 | -7.30 | -7.60  | -7.70 | -7.80 | -7.40 | -8.10 |
| 6Q7V | HLK | -8.10  | -8.20 | -7.90 | -8.50  | -8.90 | -8.60 | -8.00 | -8.30  | -7.50 | -7.50 | -7.90 | -7.60 |
| 6Q7W | HLQ | -7.60  | -7.60 | -8.10 | -8.10  | -8.60 | -7.60 | -7.50 | -8.10  | -7.20 | -7.30 | -7.60 | -7.40 |
| 6TPR | NV5 | -9.20  | -9.30 | -9.70 | -10.40 | -9.90 | -8.60 | -9.40 | -9.80  | -7.10 | -7.20 | -7.60 | -7.90 |
| 6Z07 | Q4E | -4.30  | -7.50 | -7.70 | -9.50  | -7.20 | -8.60 | -7.80 | -9.50  | -7.60 | -7.70 | -7.90 | -8.20 |
| 6Z17 | Q4W | -4.40  | -7.40 | -7.90 | -8.60  | -6.70 | -7.90 | -7.60 | -10.00 | -7.50 | -7.50 | -7.90 | -8.20 |
| 6Z5K | QAE | -4.80  | -7.00 | -7.50 | -9.60  | -7.10 | -8.50 | -7.70 | -9.20  | -7.20 | -7.20 | -7.40 | -7.80 |
| 6YZ3 | Q25 | -4.50  | -7.50 | -8.00 | -9.70  | -7.20 | -8.00 | -7.70 | -9.80  | -7.20 | -7.60 | -7.60 | -8.00 |
|      |     | LeDock |       |       |        |       |       |       |        |       |       |       |       |
|      |     | 4JVC   | 4JVD  | 4JVI  | 6B8A   | 6Q7U  | 6Q7V  | 6Q7W  | 6TPR   | 6Z07  | 6Z17  | 6Z5K  | 6YZ3  |
| 4JVD | NNQ | -5.08  | -5.06 | -5.15 | -5.49  | -5.32 | -4.91 | -5.23 | -5.11  | -5.64 | -5.83 | -6.04 | -6.13 |
| 4JVI | QZN | -6.27  | -6.19 | -6.44 | -6.92  | -6.25 | -5.97 | -6.75 | -5.66  | -5.81 | -5.97 | -6.68 | -6.76 |

|                  |            |             |             |             |             |             |             |             |             |             |             |             |             |
|------------------|------------|-------------|-------------|-------------|-------------|-------------|-------------|-------------|-------------|-------------|-------------|-------------|-------------|
| <b>6B8A</b>      | <b>M64</b> | -8.40       | -6.90       | -7.26       | -7.87       | -8.30       | -8.07       | -7.36       | -7.80       | -5.97       | -6.44       | -6.91       | -6.97       |
| <b>6Q7U</b>      | <b>HLH</b> | -4.76       | -4.77       | -4.95       | -5.24       | -4.98       | -4.73       | -5.15       | -4.98       | -5.31       | -5.94       | -5.97       | -6.03       |
| <b>6Q7V</b>      | <b>HLK</b> | -5.69       | -6.37       | -5.78       | -6.23       | -6.15       | -5.88       | -6.23       | -5.97       | -5.42       | -6.05       | -6.30       | -6.27       |
| <b>6Q7W</b>      | <b>HLQ</b> | -6.19       | -6.17       | -6.29       | -6.44       | -6.59       | -6.14       | -6.04       | -5.89       | -5.22       | -5.44       | -5.95       | -6.12       |
| <b>6TPR</b>      | <b>NV5</b> | -6.98       | -7.70       | -6.39       | -7.64       | -7.38       | -7.20       | -8.03       | -7.18       | -5.05       | -5.66       | -6.10       | -6.23       |
| <b>6Z07</b>      | <b>Q4E</b> | -3.31       | -4.78       | -6.01       | -7.64       | -4.58       | -6.58       | -6.02       | -6.45       | -5.40       | -5.63       | -6.14       | -6.05       |
| <b>6Z17</b>      | <b>Q4W</b> | -3.32       | -5.23       | -6.33       | -8.38       | -4.74       | -6.04       | -6.67       | -6.96       | -5.75       | -6.00       | -6.58       | -6.26       |
| <b>6Z5K</b>      | <b>QAE</b> | -3.30       | -5.29       | -6.40       | -7.60       | -4.8        | -5.73       | -6.16       | -6.89       | -5.39       | -5.77       | -6.25       | -6.09       |
| <b>6YZ3</b>      | <b>Q25</b> | -3.28       | -5.18       | -6.56       | -7.58       | -4.77       | -5.74       | -5.94       | -6.70       | -5.33       | -5.56       | -6.13       | -6.07       |
| <b>CHEMPLP</b>   |            |             |             |             |             |             |             |             |             |             |             |             |             |
|                  |            | <b>4JVC</b> | <b>4JVD</b> | <b>4JVI</b> | <b>6B8A</b> | <b>6Q7U</b> | <b>6Q7V</b> | <b>6Q7W</b> | <b>6TPR</b> | <b>6Z07</b> | <b>6Z17</b> | <b>6Z5K</b> | <b>6YZ3</b> |
| <b>4JVD</b>      | <b>NNQ</b> | 62.09       | 61.31       | 63.41       | 67.70       | 65.77       | 66.06       | 67.95       | 67.98       | 53.17       | 58.96       | 68.64       | 72.91       |
| <b>4JVI</b>      | <b>QZN</b> | 71.07       | 68.84       | 67.23       | 75.11       | 72.53       | 69.56       | 74.36       | 67.83       | 58.28       | 57.54       | 69.46       | 72.89       |
| <b>6B8A</b>      | <b>M64</b> | 85.59       | 78.33       | 84.79       | 89.29       | 86.21       | 79.93       | 83.48       | 81.86       | 68.13       | 66.34       | 76.52       | 80.6        |
| <b>6Q7U</b>      | <b>HLH</b> | 54.28       | 53.30       | 54.45       | 59.92       | 64.38       | 60.58       | 60.26       | 59.95       | 56.46       | 54.85       | 70.67       | 68.83       |
| <b>6Q7V</b>      | <b>HLK</b> | 58.78       | 57.29       | 57.26       | 59.59       | 58.36       | 61.11       | 63.43       | 55.03       | 61.67       | 60.89       | 70.69       | 72.26       |
| <b>6Q7W</b>      | <b>HLQ</b> | 67.57       | 66.06       | 65.66       | 69.42       | 67.04       | 63.14       | 69.53       | 63.51       | 57.50       | 60.05       | 71.86       | 74.33       |
| <b>6TPR</b>      | <b>NV5</b> | 73.76       | 82.01       | 81.87       | 95.86       | 86.80       | 79.95       | 84.02       | 84.78       | 54.41       | 59.58       | 70.63       | 77.16       |
| <b>6Z07</b>      | <b>Q4E</b> | 36.35       | 63.76       | 72.26       | 81.83       | 58.04       | 61.02       | 66.39       | 84.52       | 61.42       | 63.58       | 75.00       | 80.88       |
| <b>6Z17</b>      | <b>Q4W</b> | 36.04       | 69.41       | 70.72       | 78.30       | 56.09       | 56.09       | 63.31       | 80.02       | 59.86       | 60.55       | 75.17       | 78.93       |
| <b>6Z5K</b>      | <b>QAE</b> | 42.04       | 64.79       | 71.27       | 85.47       | 59.02       | 57.86       | 64.94       | 82.87       | 59.63       | 61.10       | 74.84       | 77.03       |
| <b>6YZ3</b>      | <b>Q25</b> | 41.35       | 64.08       | 72.96       | 91.05       | 56.69       | 60.03       | 65.94       | 85.25       | 59.44       | 62.19       | 73.16       | 77.13       |
| <b>GoldScore</b> |            |             |             |             |             |             |             |             |             |             |             |             |             |
|                  |            | <b>4JVC</b> | <b>4JVD</b> | <b>4JVI</b> | <b>6B8A</b> | <b>6Q7U</b> | <b>6Q7V</b> | <b>6Q7W</b> | <b>6TPR</b> | <b>6Z07</b> | <b>6Z17</b> | <b>6Z5K</b> | <b>6YZ3</b> |
| <b>4JVD</b>      | <b>NNQ</b> | 56.25       | 54.80       | 55.82       | 55.77       | 52.66       | 47.76       | 54.4        | 54.92       | 52.60       | 57.29       | 56.43       | 60.30       |
| <b>4JVI</b>      | <b>QZN</b> | 56.75       | 61.98       | 62.01       | 64.44       | 52.14       | 51.71       | 58.95       | 53.00       | 51.04       | 51.49       | 58.48       | 60.53       |

|           |     |       |       |       |       |       |       |       |       |       |       |       |       |
|-----------|-----|-------|-------|-------|-------|-------|-------|-------|-------|-------|-------|-------|-------|
| 6B8A      | M64 | 73.57 | 69.82 | 72.26 | 76.77 | 68.40 | 70.76 | 70.04 | 71.56 | 56.73 | 53.93 | 61.64 | 64.94 |
| 6Q7U      | HLH | 49.42 | 46.56 | 51.66 | 50.59 | 47.06 | 48.62 | 51.15 | 49.83 | 58.39 | 63.61 | 54.59 | 59.26 |
| 6Q7V      | HLK | 50.25 | 51.81 | 49.37 | 54.93 | 48.17 | 49.27 | 49.56 | 45.58 | 53.51 | 51.64 | 59.25 | 58.64 |
| 6Q7W      | HLQ | 46.03 | 49.32 | 44.24 | 49.13 | 50.31 | 48.63 | 47.11 | 55.24 | 54.88 | 53.77 | 61.76 | 60.73 |
| 6TPR      | NV5 | 70.97 | 65.11 | 68.86 | 79.12 | 65.91 | 74.45 | 70.11 | 75.15 | 51.76 | 60.15 | 57.56 | 57.14 |
| 6Z07      | Q4E | 30.07 | 54.87 | 58.81 | 73.51 | 52.89 | 52.89 | 51.19 | 73.58 | 53.88 | 56.44 | 59.80 | 59.98 |
| 6Z17      | Q4W | 28.74 | 54.99 | 59.96 | 73.43 | 53.37 | 49.71 | 51.38 | 73.69 | 57.26 | 55.68 | 62.71 | 65.23 |
| 6Z5K      | QAE | 31.29 | 54.09 | 57.26 | 73.50 | 57.35 | 48.69 | 52.16 | 71.04 | 54.14 | 59.88 | 65.56 | 61.80 |
| 6YZ3      | Q25 | 31.66 | 53.9  | 58.95 | 73.63 | 58.10 | 50.78 | 52.37 | 73.24 | 51.61 | 49.26 | 60.29 | 59.16 |
| ChemScore |     |       |       |       |       |       |       |       |       |       |       |       |       |
|           |     | 4JVC  | 4JVD  | 4JVI  | 6B8A  | 6Q7U  | 6Q7V  | 6Q7W  | 6TPR  | 6Z07  | 6Z17  | 6Z5K  | 6YZ3  |
| 4JVD      | NNQ | 33.67 | 33.54 | 34.44 | 34.66 | 30.05 | 33.80 | 36.57 | 33.97 | 24.18 | 27.72 | 33.92 | 34.75 |
| 4JVI      | QZN | 33.99 | 30.98 | 36.02 | 34.35 | 30.59 | 30.91 | 34.80 | 32.23 | 23.80 | 27.61 | 34.04 | 35.11 |
| 6B8A      | M64 | 34.64 | 32.89 | 35.30 | 37.39 | 34.51 | 32.07 | 31.16 | 35.78 | 28.6  | 30.63 | 32.92 | 34.96 |
| 6Q7U      | HLH | 29.57 | 29.41 | 31.17 | 30.39 | 23.63 | 30.81 | 31.53 | 28.99 | 25.73 | 27.43 | 31.97 | 33.19 |
| 6Q7V      | HLK | 24.65 | 24.41 | 25.53 | 25.05 | 27.92 | 25.15 | 25.01 | 24.16 | 27.12 | 29.12 | 33.57 | 35.35 |
| 6Q7W      | HLQ | 27.58 | 28.04 | 28.56 | 29.00 | 25.37 | 27.32 | 27.65 | 28.22 | 26.18 | 30.07 | 32.54 | 33.83 |
| 6TPR      | NV5 | 33.99 | 32.60 | 33.47 | 39.59 | 31.97 | 37.08 | 35.67 | 34.11 | 27.03 | 28.48 | 34.48 | 34.93 |
| 6Z07      | Q4E | 19.50 | 33.85 | 31.70 | 34.33 | 30.65 | 25.07 | 27.92 | 34.92 | 27.33 | 29.17 | 32.61 | 34.73 |
| 6Z17      | Q4W | 20.95 | 35.89 | 34.53 | 33.72 | 32.01 | 25.31 | 28.67 | 35.41 | 26.57 | 30.82 | 34.53 | 35.3  |
| 6Z5K      | QAE | 20.66 | 33.52 | 31.58 | 36.00 | 30.36 | 24.43 | 27.38 | 35.69 | 25.56 | 30.32 | 32.65 | 35.02 |
| 6YZ3      | Q25 | 20.19 | 34.03 | 32.27 | 38.53 | 30.08 | 24.38 | 27.82 | 36.48 | 26.90 | 29.09 | 32.64 | 34.24 |
| ASP       |     |       |       |       |       |       |       |       |       |       |       |       |       |
|           |     | 4JVC  | 4JVD  | 4JVI  | 6B8A  | 6Q7U  | 6Q7V  | 6Q7W  | 6TPR  | 6Z07  | 6Z17  | 6Z5K  | 6YZ3  |
| 4JVD      | NNQ | 27.04 | 27.14 | 26.91 | 29.53 | 27.6  | 27.13 | 27.15 | 27.45 | 29.94 | 28.46 | 31.59 | 32.81 |

|             |            |       |       |       |       |       |       |       |       |       |       |       |       |
|-------------|------------|-------|-------|-------|-------|-------|-------|-------|-------|-------|-------|-------|-------|
| <b>4JVI</b> | <b>QZN</b> | 30.50 | 30.58 | 33.77 | 33.12 | 31.33 | 29.84 | 29.97 | 31.21 | 29.84 | 28.09 | 31.89 | 33.85 |
| <b>6B8A</b> | <b>M64</b> | 41.90 | 40.71 | 41.85 | 47.36 | 46.78 | 39.24 | 38.05 | 40.65 | 30.92 | 30.51 | 33.43 | 34.95 |
| <b>6Q7U</b> | <b>HLH</b> | 24.30 | 23.72 | 24.83 | 26.19 | 29.67 | 24.07 | 23.78 | 24.98 | 30.56 | 29.10 | 32.40 | 33.46 |
| <b>6Q7V</b> | <b>HLK</b> | 27.09 | 27.85 | 28.40 | 28.50 | 24.37 | 28.7  | 28.24 | 26.47 | 29.77 | 29.44 | 31.88 | 33.34 |
| <b>6Q7W</b> | <b>HLQ</b> | 31.27 | 32.32 | 31.09 | 32.44 | 30.45 | 31.22 | 32.78 | 31.26 | 28.59 | 28.07 | 30.52 | 32.60 |
| <b>6TPR</b> | <b>NV5</b> | 32.54 | 34.13 | 37.49 | 35.94 | 38.22 | 33.15 | 33.42 | 36.23 | 30.45 | 28.59 | 32.46 | 33.47 |
| <b>6Z07</b> | <b>Q4E</b> | 11.47 | 27.48 | 31.00 | 40.65 | 24.87 | 29.32 | 32.23 | 34.43 | 30.43 | 29.19 | 32.96 | 33.93 |
| <b>6Z17</b> | <b>Q4W</b> | 11.51 | 27.55 | 30.49 | 41.03 | 24.84 | 27.37 | 31.22 | 33.07 | 31.89 | 30.01 | 33.33 | 33.95 |
| <b>6Z5K</b> | <b>QAE</b> | 11.42 | 27.63 | 31.43 | 43.13 | 24.77 | 28.34 | 31.96 | 35.80 | 30.02 | 29.08 | 33.11 | 33.41 |
| <b>6YZ3</b> | <b>Q25</b> | 11.48 | 27.69 | 31.57 | 42.74 | 25.40 | 28.92 | 32.12 | 35.23 | 29.73 | 28.86 | 32.88 | 34.22 |

**Table S2.** Summary of the MD simulations results on the replicas performed for the top 5 Mvfr-FDA complexes. Average protein RMSD values (Å), average ligand RMSD (Å), Average Mvfr-ligand complex SASA (Å<sup>2</sup>), Percentage of SASA for the buried ligand, average number of ligand hydrogen bonds.

| ID                | Average Protein RMSd (Å) | Average Ligand RMSD | SASA (Å <sup>2</sup> ) | Percentage of Potential Ligand SASA Buried (%) | Average number H bonds | ΔGbind (kcal/mol) | Main Contributors (kcal/mol)                |
|-------------------|--------------------------|---------------------|------------------------|------------------------------------------------|------------------------|-------------------|---------------------------------------------|
| Venetoclax        | 2.3 ± 0.2                | 2.7 ± 0.4           | 344.8 ± 27.0           | 70.4 ± 0.02                                    | 0.5 ± 0.6              | -70.1 ± 0.3       | TYR258 (-4.9), ILE186 (-4.3), ILE236 (-2.9) |
|                   | 2.7 ± 0.2                | 2.9 ± 0.4           | 307.8 ± 42.3           | 72.2 ± 0.04                                    | 0.4 ± 0.6              | -64.1 ± 0.3       | TYR258 (-3.6), ILE186 (-3.3), ILE236 (-2.5) |
|                   | 2.2 ± 0.2                | 2.9 ± 0.2           | 352.8 ± 33.2           | 68.5 ± 0.03                                    | 0.4 ± 0.5              | -66.2 ± 0.2       | TYR258 (-4.6), ILE186 (-3.2), ILE236 (-3.1) |
| Indocyanine Green | 2.2 ± 0.2                | 2.3 ± 0.2           | 298.9 ± 28.3           | 72.3 ± 0.03                                    | 1.1 ± 0.8              | -58.6 ± 0.3       | ILE186 (-4.2), ILE236 (-3.1), TYR258 (-3.1) |
|                   | 2.2 ± 0.2                | 2.4 ± 0.2           | 283.5 ± 32.0           | 73.6 ± 0.03                                    | 1.0 ± 0.7              | -59.2 ± 0.3       | ILE186 (-4.1), ILE236 (-3.3), TYR258 (-3.2) |
|                   | 2.6 ± 0.4                | 2.3 ± 0.3           | 279.4 ± 32.9           | 74.1 ± 0.03                                    | 0.8 ± 0.6              | -55.3 ± 0.3       | ILE186 (-3.3), ILE236 (-3.1), TYR258 (-3.0) |
| Nilotinib         | 2.0 ± 0.2                | 1.7 ± 0.4           | 105.2 ± 23.2           | 86.8 ± 0.03                                    | 0.1 ± 0.3              | -48.1 ± 0.2       | ILE186 (-2.4), LEU208 (-2.1), ILE236 (-3.4) |
|                   | 2.2 ± 0.2                | 0.9 ± 0.1           | 71.6 ± 18.6            | 91.0 ± 0.02                                    | 0.3 ± 0.4              | -53.3 ± 0.2       | ILE186 (-2.7), LEU208 (-1.7), ILE236 (-3.8) |
|                   | 2.7 ± 0.5                | 1.0 ± 0.2           | 84.7 ± 23.2            | 89.3 ± 0.03                                    | 0.1 ± 0.3              | -50.7 ± 0.2       | ILE186 (-2.6), LEU208 (-1.5), ILE236 (-3.7) |
| Cabozantinib      | 2.3 ± 0.3                | 1.6 ± 0.4           | 135.3 ± 40.5           | 82.3 ± 0.1                                     | 0.03 ± 0.2             | -44.6 ± 0.2       | ILE236 (-3.2), ILE186 (-2.4), LEU208 (-2.3) |
|                   | 2.3 ± 0.3                | 1.2 ± 0.2           | 147.4 ± 46.3           | 80.7 ± 0.1                                     | 0.3 ± 0.4              | -43.1 ± 0.2       | ILE236 (-3.2), ILE186 (-2.5), LEU208 (-2.4) |
|                   | 2.3 ± 0.2                | 1.4 ± 0.1           | 104.6 ± 25.0           | 86.4 ± 0.03                                    | 0.02 ± 0.1             | -47.9 ± 0.2       | ILE236 (-3.4), ILE186 (-1.4), LEU208 (-2.1) |
| Montelukast       | 2.2 ± 0.2                | 2.2 ± 0.4           | 228.8 ± 35.6           | 73.8 ± 0.04                                    | 0.04 ± 0.2             | -43.2 ± 0.2       | ILE236 (-2.8), LEU207 (-2.4), ILE263 (-2.0) |
|                   | 2.2 ± 0.2                | 2.6 ± 0.4           | 231.9 ± 48.4           | 73.3 ± 0.1                                     | 0.2 ± 0.4              | -44.9 ± 0.3       | ILE236 (-3.1), LEU207 (-2.3), ILE263 (-2.2) |
|                   | 2.2 ± 0.2                | 2.5 ± 0.4           | 261.2 ± 38.4           | 70.2 ± 0.04                                    | 0.2 ± 0.4              | -41.0 ± 0.2       | ILE236 (-2.9), LEU207 (-2.7), ILE263 (-2.0) |
